# Supplementary material for: A Significant Association Between Rhein and Diabetic Nephropathy in Animals: A Systematic Review and Meta-Analysis
Source: PubMed Central journal article supplement (PMC6923681; doi:10.3389/fphar.2019.01473), 2019-12-13
Supplement: DataSheet_1.pdf [file DataSheet_1.pdf]

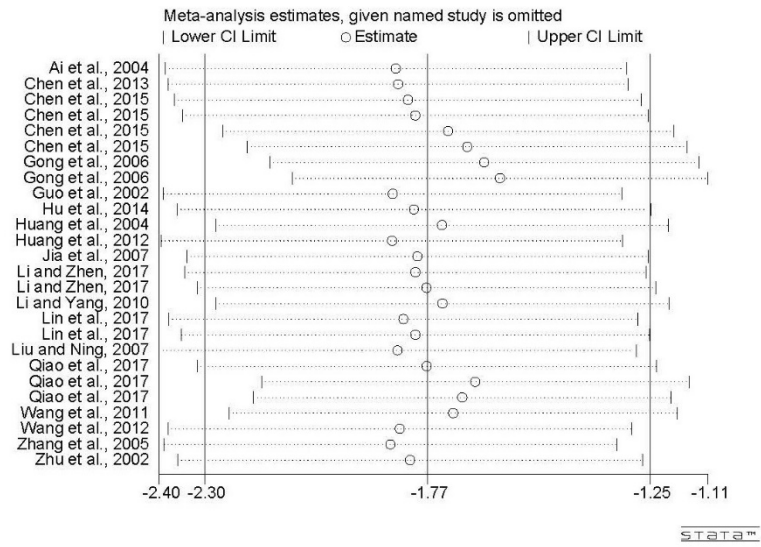

**Figure S1** Results of sensitivity analysis according to blood glucose.

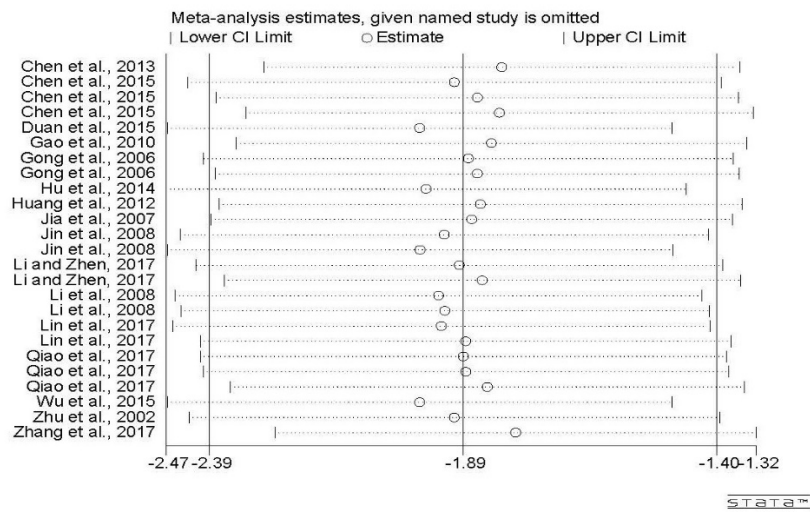

**Figure S2** Results of sensitivity analysis according to Scr.

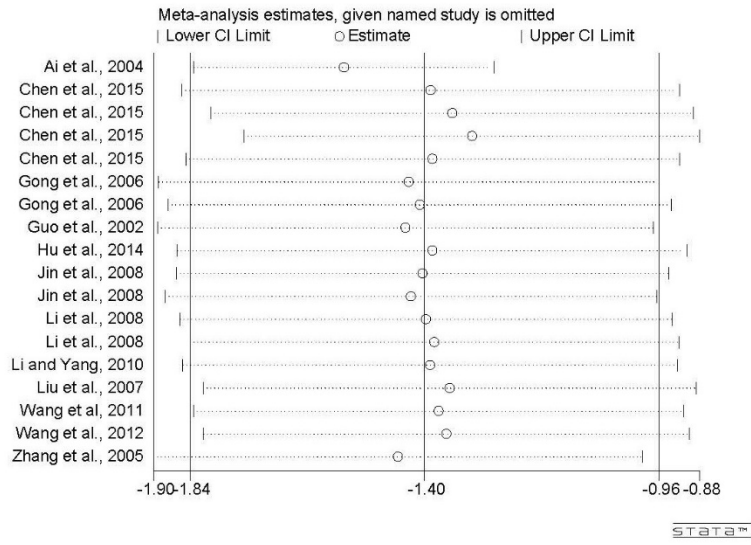

**Figure S3** Results of sensitivity analysis according to urine protein.

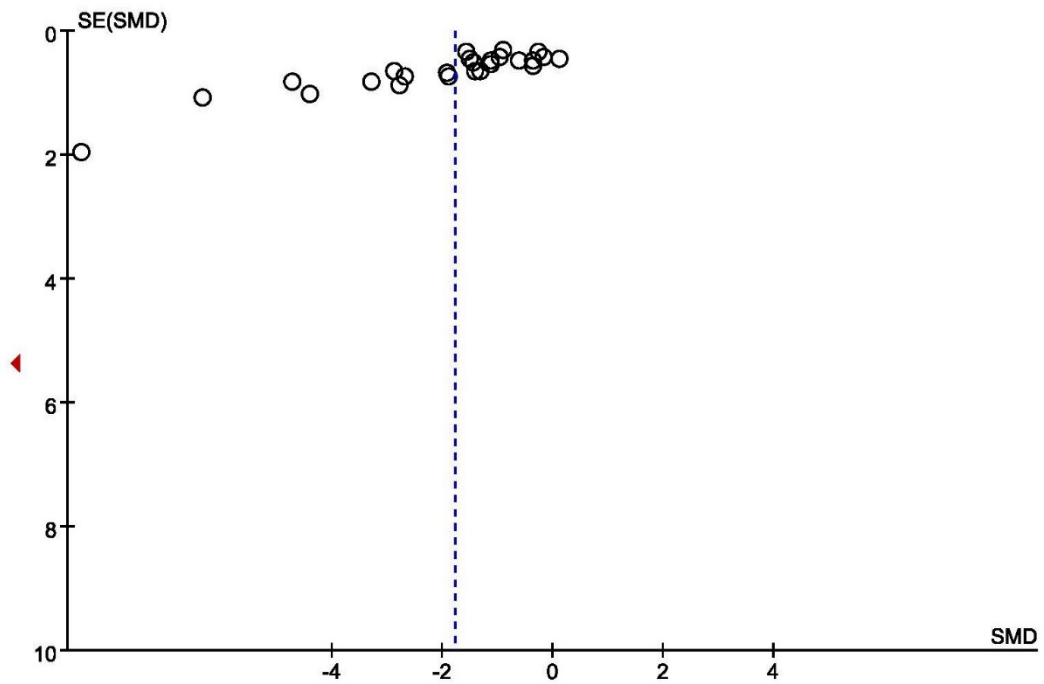

**Figure S4** Funnel plot for effectiveness of rhein on blood glucose.

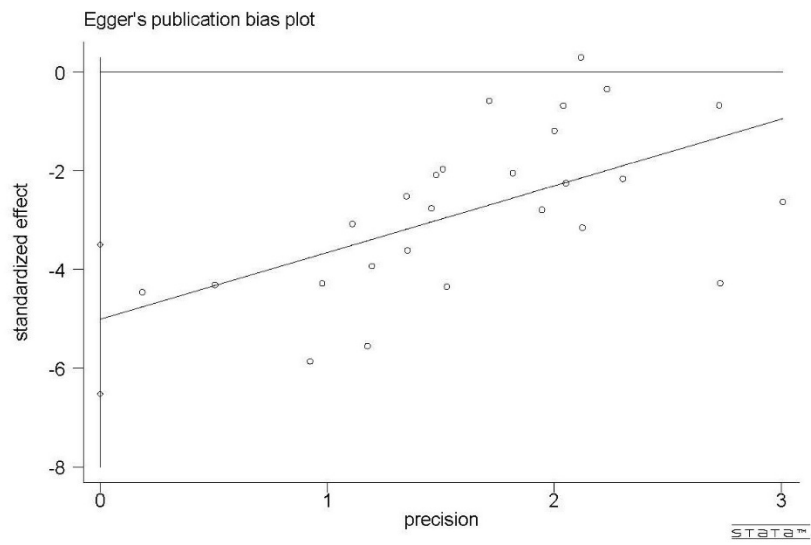

**Figure S5** Egger's test according to blood glucose.

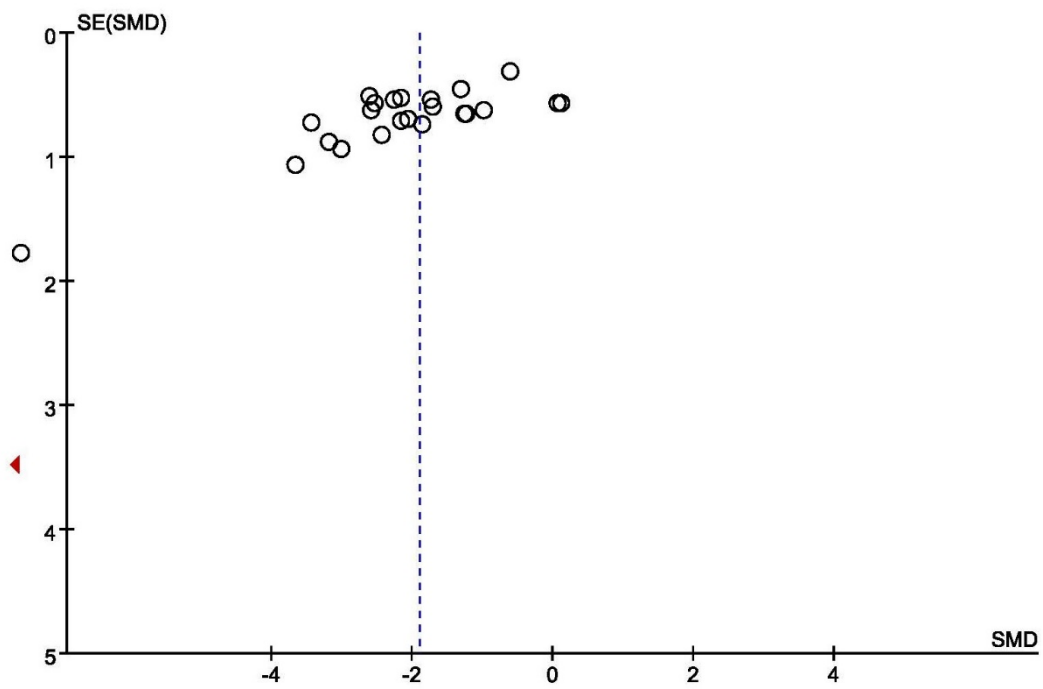

**Figure S6** Funnel plot for effectiveness of rhein on Scr.

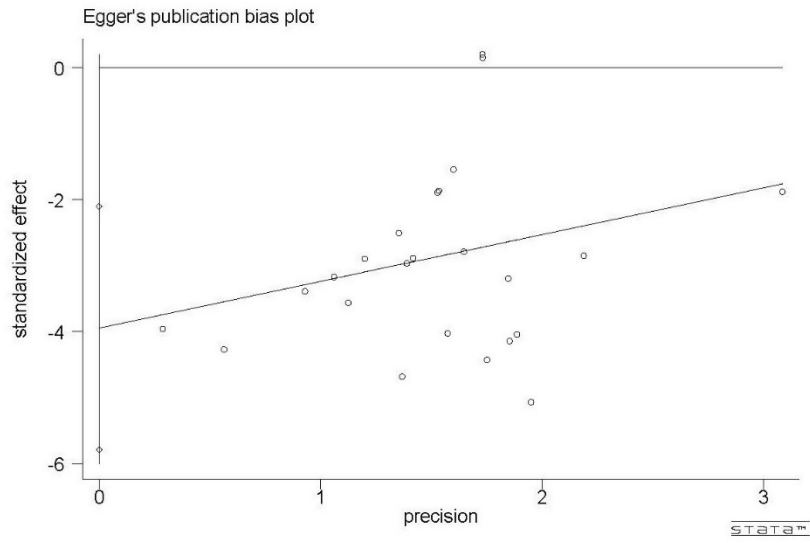

**Figure S7** Egger's test according to Scr.

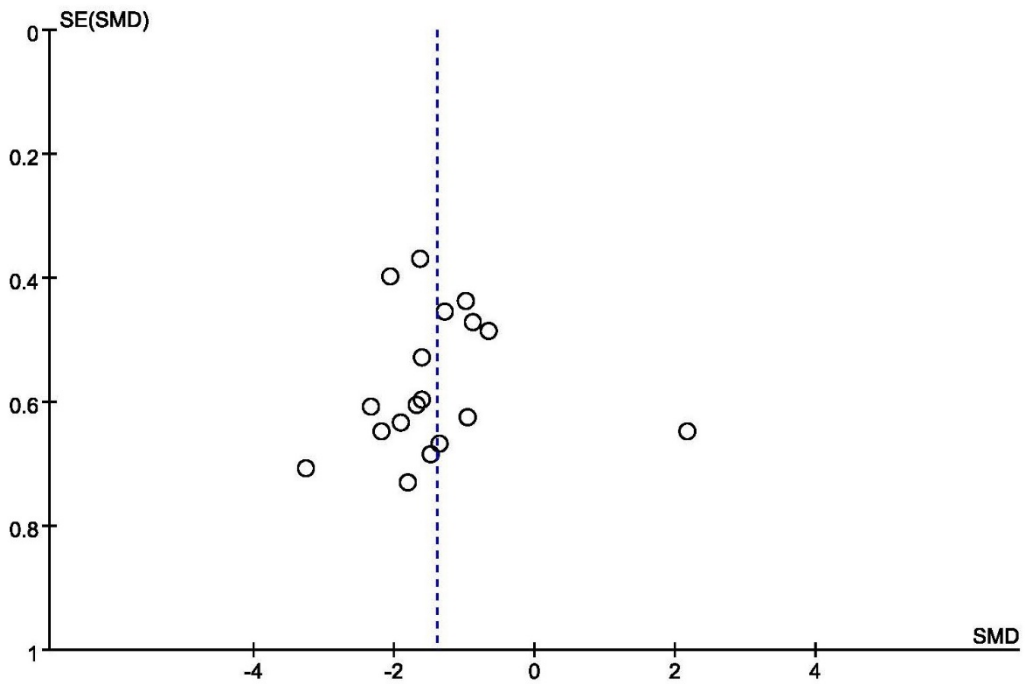

**Figure S8** Funnel plot for effectiveness of rhein on urine protein.

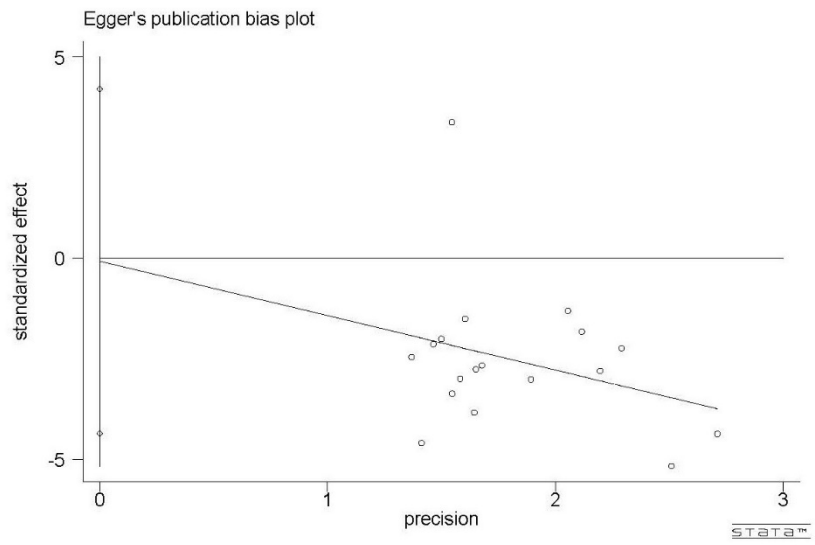

**Figure S9** Egger's test according to urine protein.
